# Supplementary material for: Ultra-small iron-gallic acid coordination polymer nanoparticles for chelator-free labeling of 64Cu and multimodal imaging-guided photothermal therapy
Source: Royal Society of Chemistry journal article supplement (doi:10.1039/c7nr03086j), 2017-01-01
Supplement: c7nr03086j1.pdf [file c7nr03086j1.pdf]

## Supporting Information

### Ultra-small Iron-Gallic Acid Coordination Polymer Nanoparticles for Chelator-free Labeling of $^{64}\text{Cu}$ and Multimodal Imaging-guided Photothermal Therapy

Qiutong Jiu<sup>1</sup>, Yenchun Zhu<sup>1</sup>, Dawei Jiang<sup>2,3</sup>, Rui Zhang<sup>1</sup>, Christopher J. Kuttyreff<sup>2</sup>,  
Jonathan W. Engle<sup>2</sup>, Peng Huang<sup>3</sup>, Weibo Cai<sup>2\*</sup>, Zhuang Liu<sup>1</sup>, and Liang Cheng<sup>\*1</sup>

<sup>1</sup>Institute of Functional Nano & Soft Materials (FUNSOM), College of Nano Science  
& Technology (CNST), Collaborative Innovation Center of Suzhou Nano Science and  
Technology, Soochow University, Suzhou, Jiangsu 215123, China

<sup>2</sup>Departments of Radiology and Medical Physics, University of Wisconsin-Madison,  
Wisconsin 53705, United States

<sup>3</sup> Guangdong Key Laboratory for Biomedical Measurements and Ultrasound Imaging,  
School of Biomedical Engineering, Shenzhen University, Shenzhen 518060, China

Email: [lcheng2@suda.edu.cn](mailto:lcheng2@suda.edu.cn); [WCai@uwhealth.org](mailto:WCai@uwhealth.org)

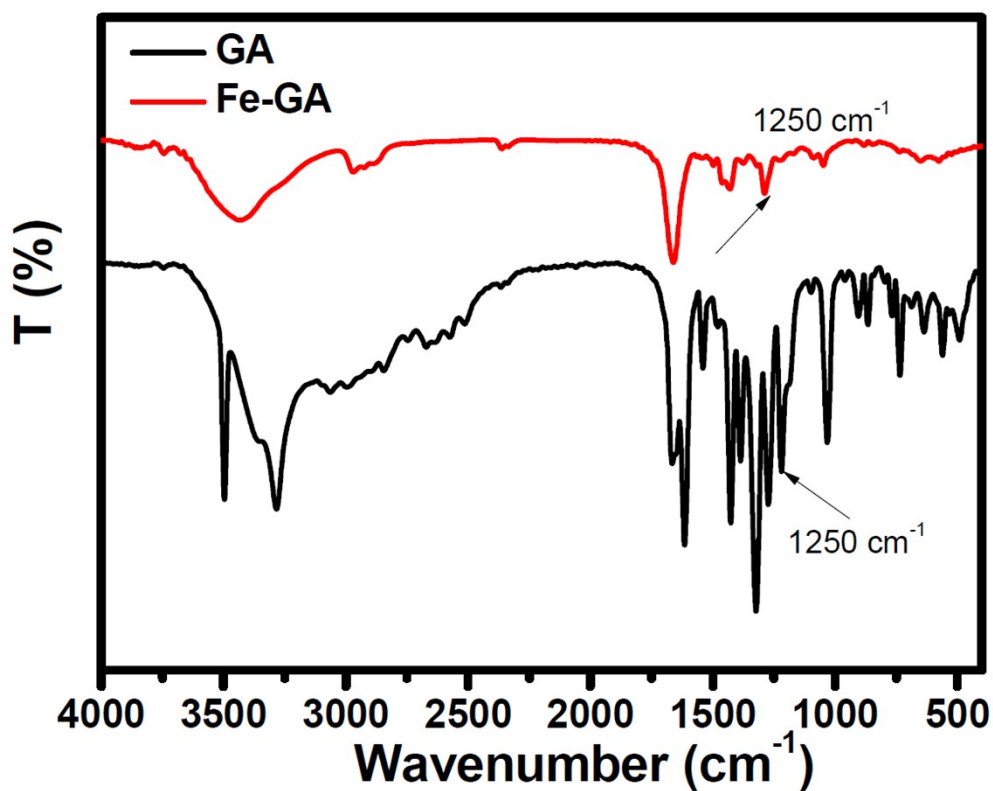

**Supporting Figure S1.** FTIR spectra of the as-prepared GA and Fe-GA CPNs. The infrared intensity of Fe-GA CPNs at 1250 cm<sup>-1</sup> (the HO-C stretching band) was lower than that of GA, indicating that the HO-C phenolic hydroxyl group of GA coordinated with Fe<sup>3+</sup>.

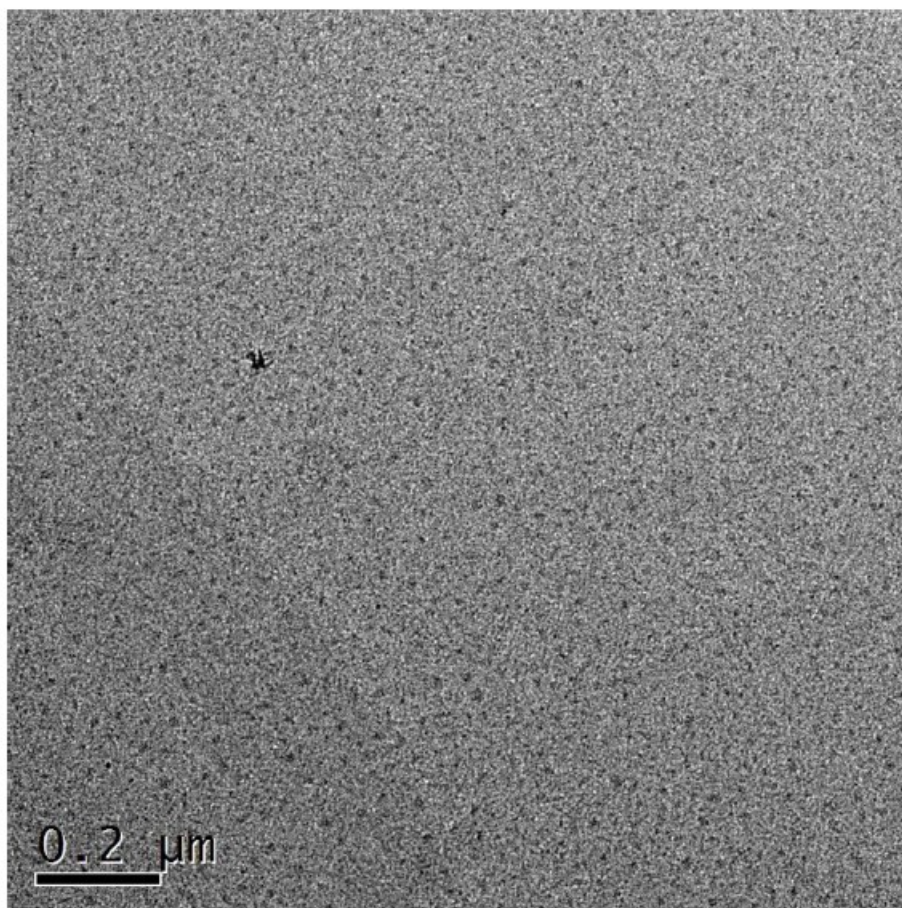

**Supporting Figure S2.** TEM images of the synthesized Fe-GA CPNs. From the TEM image, we can find the size is uniform with the diameter  $\sim 5$  nm.

## Fe-GA in 0.9% NaCl   Fe-GA in H<sub>2</sub>O

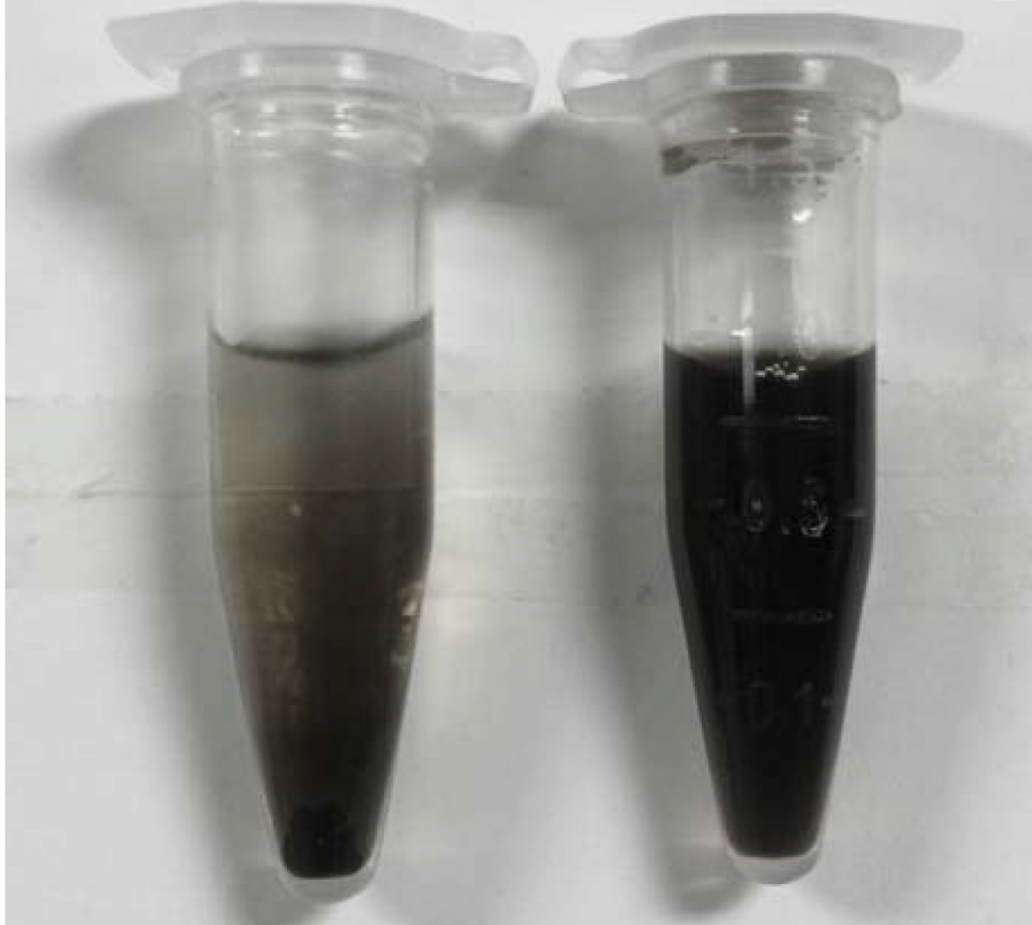

**Supporting Figure S3.** A photo of Fe-GA CPNs in 0.9 % NaCl salt solution and water for 24 h. Fe-GA CPNs without PEGylation would be aggregated in salt solution though the surface protected by PVP.

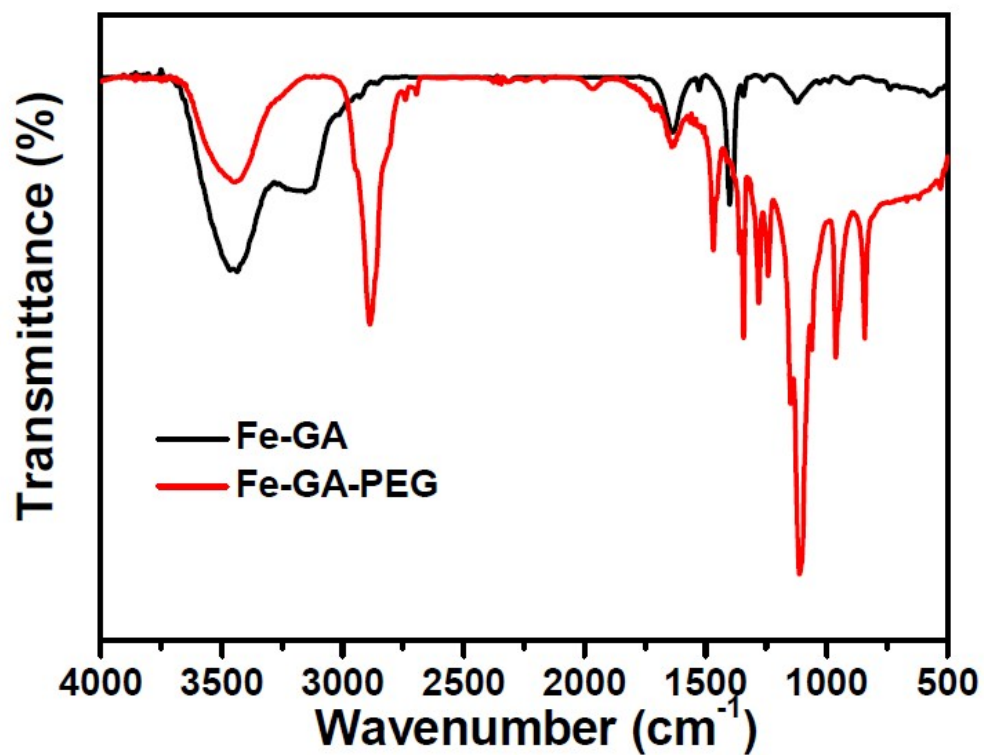

**Supporting Figure S4.** FTIR spectra of the as-prepared Fe-GA and Fe-GA-PEG CPNs. Various peaks of increased intensity from 1000 to 1400 cm<sup>-1</sup> in the Fe-GA-PEG CPNs were likely due to stretching vibrations of the -C-O bond in PEG.

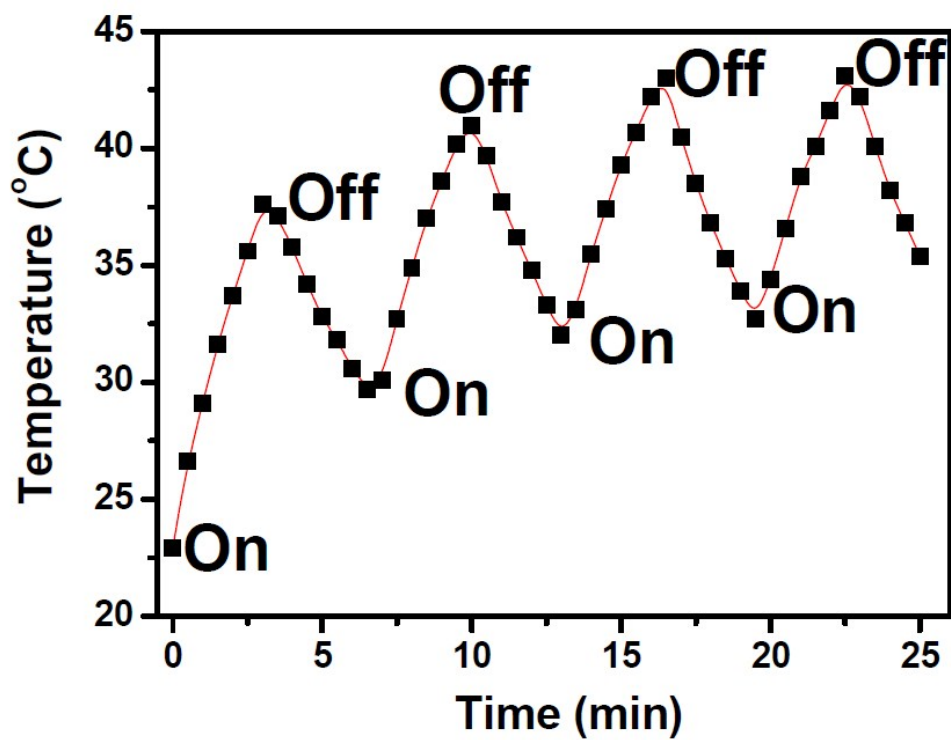

**Supporting Figure S5.** Temperature variations of Fe-GA-PEG CPNs (0.4 mg/mL) under the irradiation by the 808-nm laser at the power density of 0.8 W/cm<sup>2</sup> for 4 cycles (6 min of irradiation for each cycle).

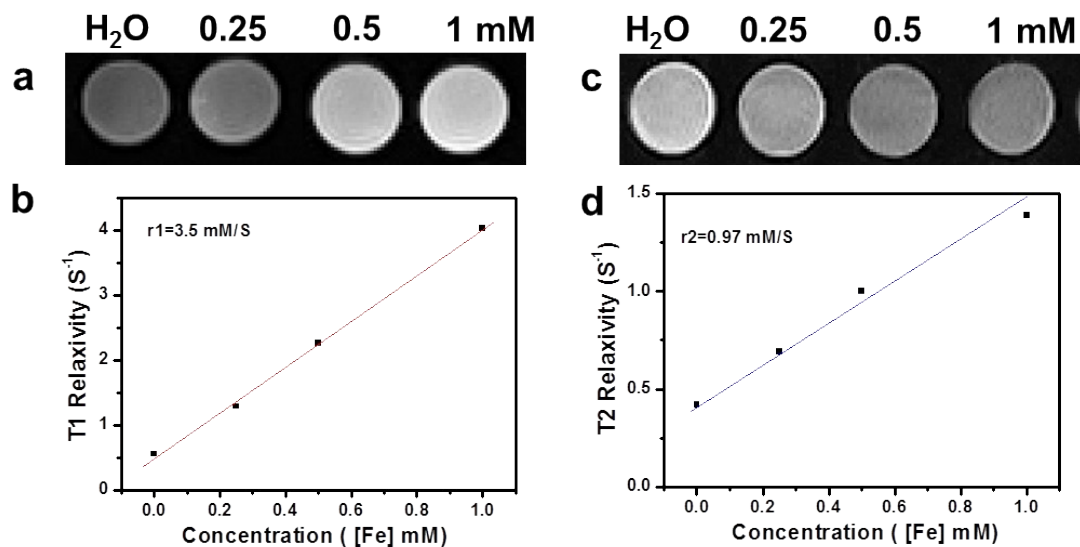

**Supporting Figure S6.** MR contrasting ability of Fe-GA-PEG CPNs. **(a&c)** T<sub>1</sub> **(a)** and T<sub>2</sub> **(c)** weighted MR images of Fe-GA-PEG CPNs with various Fe<sup>3+</sup> concentrations. **(b&d)** The Fe-GA concentration dependent T<sub>1</sub> relaxation rates **(b)** and T<sub>2</sub> relaxation rates **(d)** of Fe-GA-PEG CPNs. The longitudinal relaxivity ( $r_1$ ) and transverse relaxivity ( $r_2$ ) were determined to be 3.5 and 0.97 mM<sup>-1</sup>S<sup>-1</sup>, respectively.
